# Supplementary material
Source: PubMed Central journal article supplement (PMC7660982)
Supplement: ee9-2-e022-s001.pdf [file ee9-2-e022-s001.pdf]

**eTable 1.** Summary of Participant Characteristics and Pollutant Concentrations by Wave

| <b>Study Characteristics</b>           | <b>Wave 1<br/>(2004-08)<br/>% or mean (SD)</b> | <b>Wave 2<br/>(2008-2012)<br/>% or mean (SD)</b> |
|----------------------------------------|------------------------------------------------|--------------------------------------------------|
| <i>Demographics</i>                    |                                                |                                                  |
| Sex (% female)                         | 70.4                                           | 71.9                                             |
| Age (years)                            | 57.1 (7.6)                                     | 59.3 (7.7)                                       |
| Income Poverty Ratio                   |                                                |                                                  |
| <i>Education</i>                       |                                                |                                                  |
| <8 <sup>th</sup> grade                 | 35.9                                           | 36.5                                             |
| 9-12 <sup>th</sup> grade               | 48.8                                           | 48.9                                             |
| College and above                      | 15.2                                           | 14.6                                             |
| <i>Behavior</i>                        |                                                |                                                  |
| Physical activity <sup>1</sup>         | 31.6 (4.7)                                     | 31.8 (4.7)                                       |
| <i>Cognitive Test Scores</i>           |                                                |                                                  |
| Verbal memory (16 pts)                 | 8.0 (2.3)                                      | 8.2 (2.3)                                        |
| Recognition (16 pts)                   | 12.9 (2.7)                                     | 13.4 (2.4)                                       |
| Executive functioning (#)              | 23.4 (10.3)                                    | 24.4 (11.3)                                      |
| Mental processing speed (#)            | 22.7 (10.4)                                    | 22.4 (10.5)                                      |
| Visuospatial (12 pts)                  | 5.7 (3.1)                                      | 5.5 (3.2)                                        |
| <i>Mean Pollutant Concentration</i>    |                                                |                                                  |
| PM <sub>2.5</sub> (ng/m <sup>3</sup> ) | 9781 (896)                                     | 7742 (654)                                       |
| Black carbon (ng/m <sup>3</sup> )      | 665 (85)                                       | 610 (96)                                         |
| Nickel (ng/m <sup>3</sup> )            | 2.8 (0.8)                                      | 1.0 (0.3)                                        |
| Silicon (ng/m <sup>3</sup> )           | 64.4 (6.9)                                     | 62.6 (15.9)                                      |
| Sulfur (ng/m <sup>3</sup> )            | 1077 (90)                                      | 707 (16)                                         |

**eFigure 1.** Difference in Cognitive Score<sup>1</sup> Per IQR increase<sup>2</sup> in Source Tracers and PM<sub>2.5</sub> ( $\beta$ (95% CI)) for 1- and 2-Year Moving Averages<sup>3</sup>

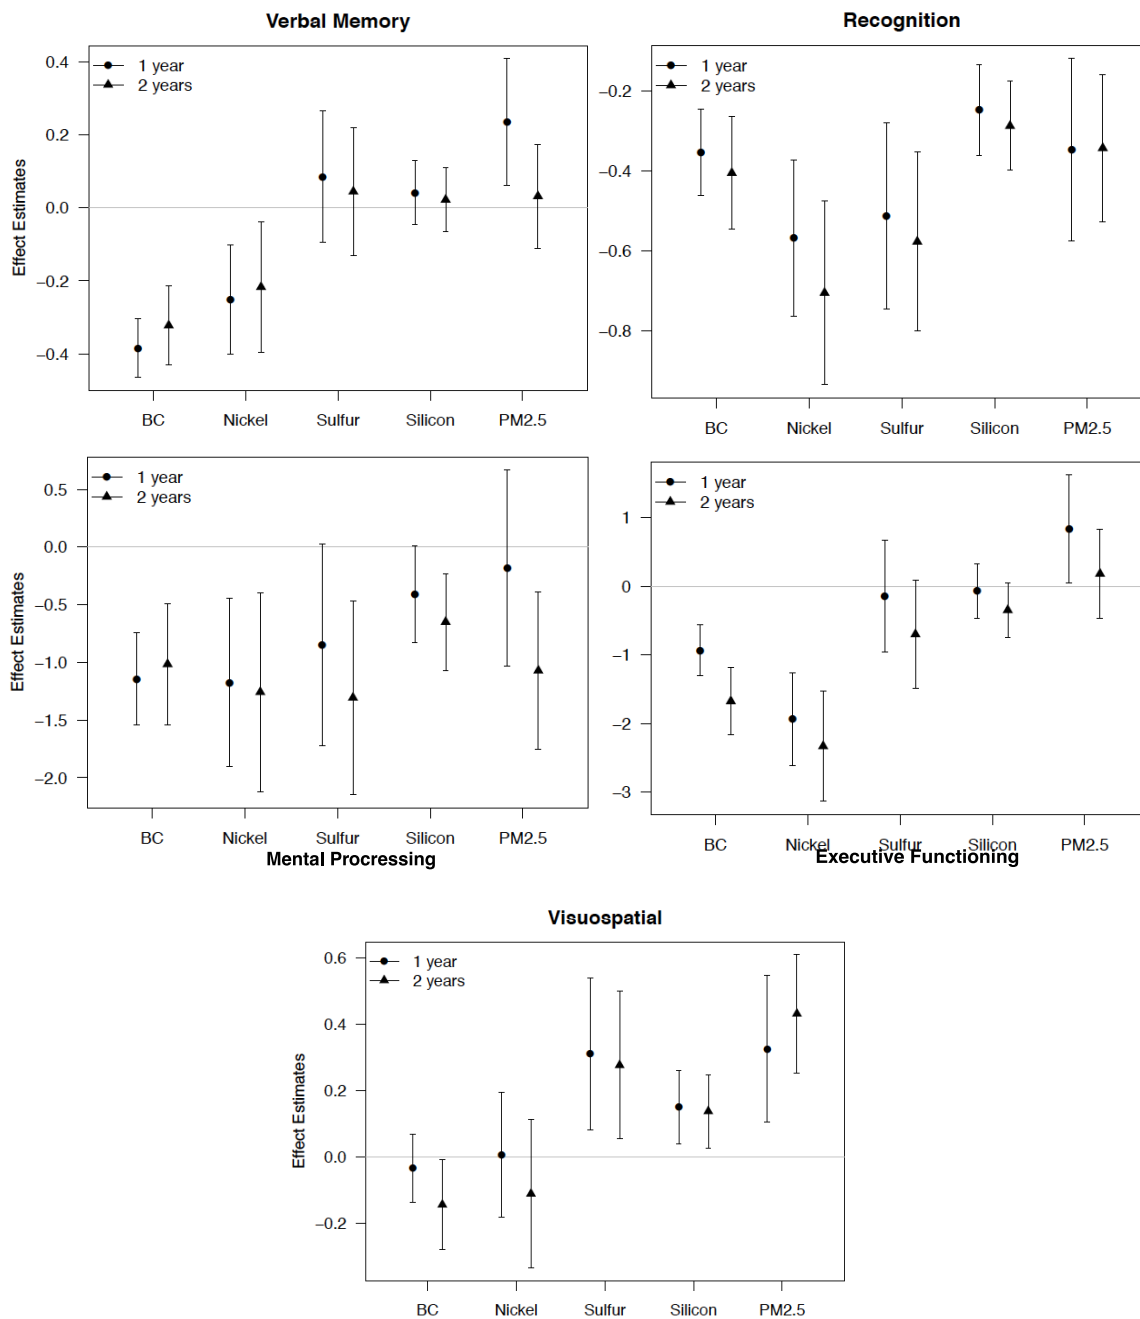

<sup>1</sup>Controlling for: age, sex, education, season, physical activity, income poverty ratio

<sup>2</sup>IQR for BC= 53.0 ng/m<sup>3</sup>, nickel=2.00ng/m<sup>3</sup>, sulfur =390 ng/m<sup>3</sup>, PM<sub>2.5</sub>=1750 ng/m<sup>3</sup>

<sup>3</sup>Y-axes are scaled according to cognitive test

**eTable 2.** Pearson Correlation Coefficients Comparing Annual Average Pollutant Concentrations<sup>1</sup>

|                   | BC    | Nickel | Sulfur | Silicon |
|-------------------|-------|--------|--------|---------|
| PM <sub>2.5</sub> | 0.37* | 0.72*  | 0.95*  | 0.19*   |
| BC                | 1.00  | 0.87*  | 0.47*  | -0.34*  |
| Nickel            | --    | 1.00   | 0.87*  | 0.003   |
| Sulfur            | --    | --     | 1.00   | -0.34*  |
| Silicon           | --    | --     | --     | 1.00    |

<sup>1</sup>2003-2012; \*p-value<0.05

**eTable 3.** Difference in Cognitive Z-score<sup>1</sup> Per 1 year IQR increase<sup>2</sup> in Source Tracer Pollutants ( $\beta$ (SE))

|                   | <b>Verbal Memory</b><br>(16 pts) | <b>Recognition</b><br>(16 pts) | <b>Mental Processing (#)</b> | <b>Executive Function (#)</b> | <b>Visuospatial</b><br>(12 pts) |
|-------------------|----------------------------------|--------------------------------|------------------------------|-------------------------------|---------------------------------|
| BC                | -0.38 (0.04)**                   | -0.14 (0.02)**                 | -0.11(0.02)**                | -0.09 (0.02)**                | -0.02 (0.02)                    |
| Nickel            | -0.25 (0.08)**                   | -0.22 (0.04)**                 | -0.11 (0.02)**               | -0.18 (0.03)**                | -0.02 (0.01)                    |
| Sulfur            | 0.08 (0.10)                      | -0.17 (0.05)**                 | -0.08 (0.04)                 | -0.01 (0.04)                  | 0.10 (0.03)**                   |
| Silicon           | 0.04 (0.05)                      | -0.09 (0.02)**                 | -0.04 (0.02)                 | -0.10 (0.02)                  | 0.05 (0.02)*                    |
| PM <sub>2.5</sub> | 0.23 (0.08)**                    | -0.13 (0.04)**                 | -0.02 (0.04)                 | 0.08 (0.04)**                 | 0.82(0.04)**                    |

<sup>1</sup>Controlling for: age, sex, education, season, physical activity, income to poverty ratio

<sup>2</sup> IQR for PM<sub>2.5</sub> = 1750 ng/m<sup>3</sup>, sulfur =390 ng/m<sup>3</sup>, nickel =2.00ng/m<sup>3</sup>, BC = 53.0 ng/m<sup>3</sup>, silicon = 11.0 ng/m<sup>3</sup>  
p value \*\*<0.05 \*<0.10

**eTable 4.** Change in Cognitive Score Per IQR<sup>2</sup> increase in Difference between Waves of Source Tracer Pollutants ( $\beta$ (SE))

|                   | <b>Verbal Memory</b><br>(16 pts) | <b>Recognition</b><br>(16 pts) | <b>Mental Processing (#)</b> | <b>Executive Function (#)</b> | <b>Visuospatial</b><br>(12 pts) |
|-------------------|----------------------------------|--------------------------------|------------------------------|-------------------------------|---------------------------------|
| BC                | -3.82 (0.50)**                   | -0.37 (0.18)*                  | -2.01 (0.49)**               | -1.48 (0.40)**                | -0.04 (0.18)                    |
| Nickel            | -1.60 (0.49)**                   | -0.18 (0.14)                   | -1.06 (0.41)**               | -1.92 (0.39)**                | -0.14 (0.12)                    |
| Sulfur            | 2.70 (0.34)**                    | 0.10 (0.08)                    | -0.16 (0.34)                 | 1.44 (0.24)**                 | 0.43 (0.06)**                   |
| Silicon           | 3.14 (0.46)**                    | 0.26 (0.13)*                   | -0.89 (0.46)*                | 3.11 (0.42)**                 | 0.97 (0.11)**                   |
| PM <sub>2.5</sub> | 3.38 (0.40)**                    | 0.28 (0.11)*                   | 0.27 (0.40)                  | 1.82 (0.61)**                 | 0.47 (0.12)**                   |

<sup>1</sup>Controlling for: age, sex, education, season, physical activity, income to poverty ratio

<sup>2</sup> IQR for PM<sub>2.5</sub> = 866 ng/m<sup>3</sup>, sulfur = 113 ng/m<sup>3</sup>, nickel = 0.71/m<sup>3</sup>, BC = 85.6 ng/m<sup>3</sup>, silicon = 21.1 ng/m<sup>3</sup>  
p value \*\*<0.05 \*<0.10

**eTable 5.** Summary of Participant Characteristics and Pollutant Concentrations by Tertile of 1 yr Average of PM<sub>2.5</sub> (ng/m<sup>3</sup>)

| <b>Study Characteristics</b>   | <b>Lowest<br/>(&lt;9300)<br/>% or mean (SD)</b> | <b>Middle<br/>(9300-9555)<br/>% or mean (SD)</b> | <b>Highest<br/>(&gt;9555)<br/>% or mean (SD)</b> |
|--------------------------------|-------------------------------------------------|--------------------------------------------------|--------------------------------------------------|
| <i>Demographics</i>            |                                                 |                                                  |                                                  |
| Sex (% female)                 | 69.3                                            | 71.2                                             | 70.7                                             |
| Age (years)                    | 56.1 (7.8)                                      | 58.0 (7.2)                                       | 57.2 (7.6)                                       |
| % Income to Poverty Ratio      | 125.2 (117.0)                                   | 128.9 (239.1)                                    | 131.0 (128.8)                                    |
| <i>Education</i>               |                                                 |                                                  |                                                  |
| <8 <sup>th</sup> grade         | 32.1                                            | 38.8                                             | 36.6                                             |
| 9-12 <sup>th</sup> grade       | 53.0                                            | 46.6                                             | 47.6                                             |
| College and above              | 14.9                                            | 14.6                                             | 15.8                                             |
| Physical activity <sup>1</sup> | 31.6 (4.7)                                      | 31.6 (4.7)                                       | 31.5 (4.8)                                       |
| <i>Cognitive Test Scores</i>   |                                                 |                                                  |                                                  |
| Verbal memory (16 pts)         | 8.1 (2.4)                                       | 8.2 (2.3)                                        | 7.8 (2.3)                                        |
| Recognition (16 pts)           | 13.0 (2.6)                                      | 13.2 (2.6)                                       | 12.7 (2.8)                                       |
| Executive functioning (#)      | 23.6(10.3)                                      | 23.8 (10.4)                                      | 23.0 (10.5)                                      |
| Mental processing speed (#)    | 23.7 (10.5)                                     | 23.2 (10.7)                                      | 22.9 (10.5)                                      |
| Visuospatial (12 pts)          | 6.0 (3.1)                                       | 5.5 (3.1)                                        | 5.9 (3.2)                                        |

**eTable 6.** Summary of Participant Characteristics and Pollutant Concentrations by Tertile of 1 yr Average of Nickel (ng/m<sup>3</sup>)

| <b>Study Characteristics</b> | <b>Lowest<br/>(&lt;2.0)</b> | <b>Middle<br/>(2.0-3.0)</b> | <b>Highest<br/>(&gt;3.0)</b> |
|------------------------------|-----------------------------|-----------------------------|------------------------------|
|------------------------------|-----------------------------|-----------------------------|------------------------------|

|                                | % or mean (SD) | % or mean (SD) | % or mean (SD) |
|--------------------------------|----------------|----------------|----------------|
| <i>Demographics</i>            |                |                |                |
| Sex (% female)                 | 67.9           | 69.4           | 72.4           |
| Age (years)                    | 55.6 (7.8)     | 56.6 (8.1)     | 58.2 (7.1)     |
| % Income to Poverty Ratio      | 129.7 (239.7)  | 117.4 (100.2)  | 133.0 (133.8)  |
| <i>Education</i>               |                |                |                |
| <8 <sup>th</sup> grade         | 30.3           | 35.3           | 39.6           |
| 9-12 <sup>th</sup> grade       | 54.9           | 52.5           | 43.7           |
| College and above              | 14.8           | 12.2           | 16.8           |
| Physical activity <sup>1</sup> | 31.6 (4.9)     | 31.1 (4.4)     | 31.7 (4.8)     |
| <i>Cognitive Test Scores</i>   |                |                |                |
| Verbal memory (16 pts)         | 8.1 (2.4)      | 7.9 (2.4)      | 8.0 (2.3)      |
| Recognition (16 pts)           | 13.1 (2.6)     | 12.7 (2.9)     | 12.9 (2.6)     |
| Executive functioning (#)      | 24.3 (10.1)    | 22.9 (10.3)    | 23.8 (10.6)    |
| Mental processing speed (#)    | 24.5 (10.6)    | 22.8 (10.4)    | 22.6 (10.6)    |
| Visuospatial (12 pts)          | 6.1 (3.1)      | 5.5 (3.2)      | 5.7 (3.1)      |

**eTable 7.** Summary of Participant Characteristics and Pollutant Concentrations by Tertile of 1 yr Average of Silicon (ng/m<sup>3</sup>)

| Study Characteristics | Lowest         | Middle         | Highest        |
|-----------------------|----------------|----------------|----------------|
|                       | (<61.2)        | (61.2-63.9)    | (>63.9)        |
|                       | % or mean (SD) | % or mean (SD) | % or mean (SD) |

|                                |               |               |               |
|--------------------------------|---------------|---------------|---------------|
| <i>Demographics</i>            |               |               |               |
| Sex (% female)                 | 68.3          | 74.3          | 69.2          |
| Age (years)                    | 57.4 (7.3)    | 57.8 (7.8)    | 56.3 (7.6)    |
| % Income to Poverty Ratio      | 126.6 (125.0) | 130.0 (127.2) | 129.4 (215.3) |
| <i>Education</i>               |               |               |               |
| <8 <sup>th</sup> grade         | 35.8          | 40.9          | 32.1          |
| 9-12 <sup>th</sup> grade       | 48.0          | 44.5          | 52.9          |
| College and above              | 16.2          | 14.5          | 15.0          |
| Physical activity <sup>1</sup> | 31.6 (4.9)    | 31.3 (4.8)    | 31.6 (4.5)    |
| <i>Cognitive Test Scores</i>   |               |               |               |
| Verbal memory (16 pts)         | 8.1 (2.4)     | 7.8 (2.2)     | 8.0 (2.4)     |
| Recognition (16 pts)           | 13.0 (2.7)    | 12.7 (2.6)    | 13.0 (2.7)    |
| Executive functioning (#)      | 24.1 (10.4)   | 22.8 (10.2)   | 24.1 (10.3)   |
| Mental processing speed (#)    | 22.9 (11.0)   | 22.8 (10.5)   | 23.8 (10.3)   |
| Visuospatial (12 pts)          | 5.6 (3.1)     | 5.6 (3.2)     | 6.1 (3.1)     |

**eTable 8.** Summary of Participant Characteristics and Pollutant Concentrations by Tertile of 1 yr Average of Sulfur (ng/m<sup>3</sup>)

| Study Characteristics | <b>Lowest</b>     | <b>Middle</b>      | <b>Highest</b>    |
|-----------------------|-------------------|--------------------|-------------------|
|                       | <b>(&lt;1008)</b> | <b>(1008-1113)</b> | <b>(&gt;1113)</b> |
|                       | % or mean (SD)    | % or mean (SD)     | % or mean (SD)    |
| <i>Demographics</i>   |                   |                    |                   |



|                                |               |               |               |
|--------------------------------|---------------|---------------|---------------|
| Sex (% female)                 | 69.3          | 71.4          | 70.7          |
| Age (years)                    | 55.6 (7.8)    | 57.9 (7.4)    | 57.5 (7.3)    |
| % Income to Poverty Ratio      | 131.5 (240.0) | 123.0 (120.3) | 131.1 (127.4) |
| <i>Education</i>               |               |               |               |
| <8 <sup>th</sup> grade         | 31.6          | 39.9          | 36.0          |
| 9-12 <sup>th</sup> grade       | 52.5          | 45.1          | 49.1          |
| College and above              | 15.9          | 14.9          | 14.8          |
| Physical activity <sup>1</sup> | 31.6 (4.9)    | 31.3 (4.3)    | 31.7 (4.9)    |
| <i>Cognitive Test Scores</i>   |               |               |               |
| Verbal memory (16 pts)         | 8.1 (2.5)     | 8.2 (2.3)     | 7.8 (2.3)     |
| Recognition (16 pts)           | 13.0 (2.7)    | 13.1 (2.7)    | 12.8 (2.7)    |
| Executive functioning (#)      | 24.1 (10.3)   | 23.6 (10.7)   | 23.5 (10.1)   |
| Mental processing speed (#)    | 24.6 (10.7)   | 23.0 (10.3)   | 22.5 (10.6)   |
| Visuospatial (12 pts)          | 6.0 (3.1)     | 5.6 (3.1)     | 5.8 (3.2)     |
